# Supplementary material
Source: PubMed Central journal article supplement (PMC423261)
Supplement: pnas_101_23_8715__1.pdf [file pnas_101_23_8715__1.pdf]

**Table 2. Summary of previously reported comparative genomic hybridization (CGH) profiles of all chromosomal arms for a variety of head and neck tumor sites and stages generated by six different studies**

| Ref.           | 1p | 1q | 2p | 2q       | 3p | 3q       | 4p | 4q | 5p | 5q | 6p | 6q | 7p | 7q | 8p | 8q       | 9p | 9q       | 10p | 10q | 11p | 11q      | 12p | 12q | 13q | 14q | 15q | 16p | 16q | 17p | 17q | 18p | 18q | 19p | 19q      | 20p | 20q | 21q | 22q |          |          |
|----------------|----|----|----|----------|----|----------|----|----|----|----|----|----|----|----|----|----------|----|----------|-----|-----|-----|----------|-----|-----|-----|-----|-----|-----|-----|-----|-----|-----|-----|-----|----------|-----|-----|-----|-----|----------|----------|
| 7              | -  | +  | +  | -        | -  | +        | -  | -  | +  | +  | -  | -  | +  | E  | -  | +        | -  | +        | -   | E   | -   | E        | E   | E   | -   | +   | E   | -   | +   | +   | +   | +   | +   | -   | -        | -   | +   | +   | -   | -        |          |
| 8              | +  | +  | +  | +        | -  | +        | +  | -  | +  | -  | +  | +  | +  | +  | +  | +        | -  | +        | +   | +   | +   | +        | +   | +   | +   | +   | +   | +   | +   | +   | +   | +   | +   | +   | -        | +   | +   | +   | +   | +        | +        |
| 5              | -  | +  | +  | -        | -  | +        | -  | -  | +  | -  | E  | -  | +  | +  | -  | +        | -  | +        | -   | -   | -   | -        | -   | +   | -   | -   | -   | E   | +   | -   | +   | +   | E   | -   | +        | +   | +   | +   | -   | +        |          |
| 3              | +  | +  | NR | +        | -  | -        | NR | E  | +  | -  | NR | NR | +  | -  | -  | +        | -  | +        | -   | NR  | NR  | E        | NR  | NR  | -   | +   | -   | -   | NR  | -   | NR  | NR  | -   | -   | -        | NR  | +   | NR  | +   |          |          |
| 4              | NR | +  | +  | +        | -  | +        | -  | +  | +  | +  | +  | +  | +  | +  | -  | +        | -  | NR       | +   | +   | +   | +        | +   | -   | +   | +   | NR  | NR  | NR  | NR  | +   | NR  | +   | NR  | NR       | +   | +   | -   | -   |          |          |
| 27             | +  | +  | +  | +        | -  | +        | -  | -  | +  | E  | +  | +  | +  | +  | NR | +        | -  | +        | NR  | +   | NR  | +        | -   | +   | +   | +   | +   | +   | +   | +   | +   | +   | -   | -   | +        | +   | +   | +   | NR  | +        |          |
| Malignant data | +  | +  | +  | <b>+</b> | -  | <b>+</b> | +  | +  | +  | -  | +  | -  | +  | +  | +  | <b>+</b> | +  | <b>+</b> | -   | -   | +   | <b>+</b> | -   | -   | -   | +   | -   | +   | +   | -   | -   | -   | -   | -   | <b>+</b> | +   | +   | +   | +   | <b>+</b> | <b>+</b> |

+, Chromosomal arms demonstrating an increase in copy number, as reported by the respective study. -, Chromosomal arms demonstrating a decrease in copy number. Those cases in which defining a chromosomal arm as having a copy number aberration because of an ambiguous CGH profile for that particular arm were reported as indeterminate (I). In the setting of equivocal decreases or increases in copy number on a particular chromosomal arm, that entire arm is reported as equivocal (E). NR, not reported. Results from our *in silico* analysis of seven malignant lesions using all 9,724 annotated genes and their average expression Z scores are shown in the bottom row for comparison. Large, bold characters in the bottom row indicate that 95% confidence interval excludes no change in expression relative to normal controls.
